# Supplementary material
Source: PubMed Central journal article supplement (PMC3656131)
Supplement: NIHMS429896-supplement-supplement_1.pdf [file NIHMS429896-supplement-supplement_1.pdf]

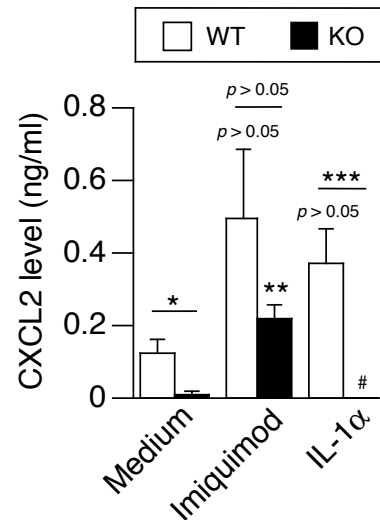

**Supplementary Figure S1. IL-1R1 deficient cells constitutively express less chemokines *in vitro*.**

Mouse primary keratinocytes isolated from wild type (WT, white bars) or IL-1R1 KO mice (KO, black bars) were treated with medium only, 50  $\mu$ g/ml imiquimod or 10 ng/ml mouse IL-1 $\alpha$  for 24 hours. Levels of CXCL2 were determined using ELISA (mean  $\pm$  SD). \*,  $P < 0.05$ ; \*\*,  $P < 0.01$ ; \*\*\*,  $P < 0.001$  (compared to medium only or as indicated). # Low levels of CXCL2 were detected.

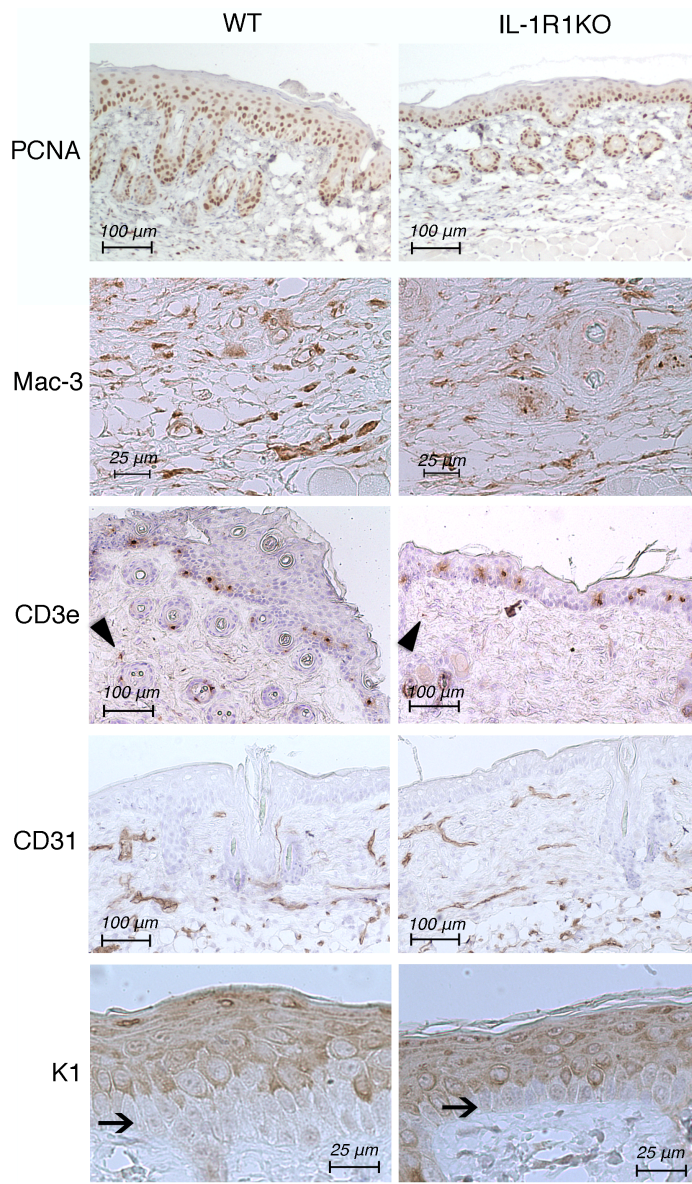

**Supplementary Figure S2. Epidermal, angiogenic and inflammatory phenotypes are differentially regulated by IL-1R1 *in vivo*.** Wild type (WT) and IL-1R1 KO mice were treated with imiquimod as described in Figure 4c. Using immunohistochemistry skin sections were examined for presence of Proliferating Cell Nuclear Antigen (PCNA, Invitrogen), macrophages (Mac-3, monoclonal M3/84, BD Pharmingen), T cells (CD3e, monoclonal 500A2, BD Pharmingen), blood vessels (endothelial marker CD31, monoclonal MEC 13.3, BD Pharmingen) and keratin 1 (polyclonal AF 109, Covance). Large arrows and arrowheads indicate positions of proliferating keratinocytes that do not express keratin 1 and dermal CD3e positive cells, respectively.

Uribe-Herranz *et al.*, IL-1R1 signaling facilitates Munro's microabscess formation in psoriasiform imiquimod-induced skin inflammation, *J Invest Dermatol*, 2013

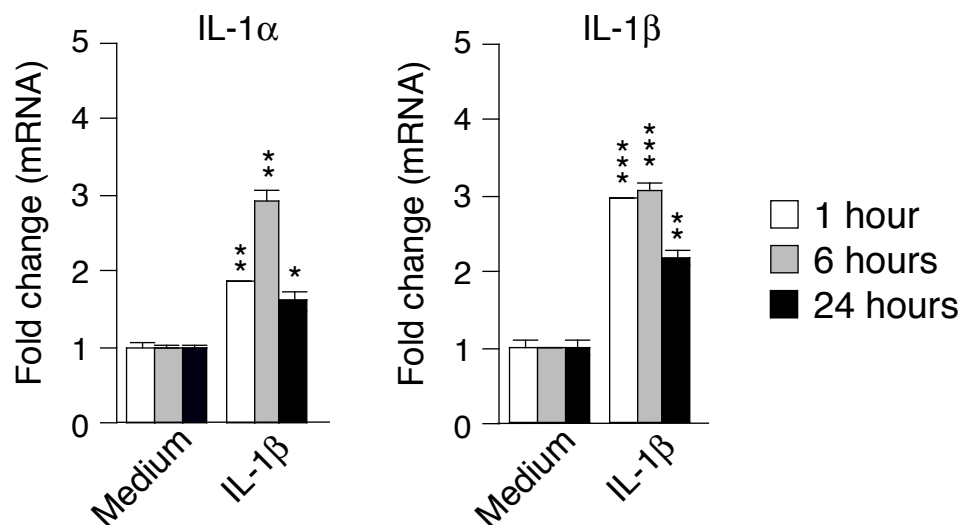

**Supplementary Figure S3. IL-1 stimulates expression of IL-1 $\alpha$  and IL-1 $\beta$  mRNAs *in vitro*.** Human primary keratinocytes were treated with medium only or IL-1 $\beta$  (10 ng/ml, PeproTech) for 1 (white bars), 6 (grey bars) or 24 hours (black bars). Levels of IL-1 $\alpha$  and IL-1 $\beta$  mRNAs were determined using real-time RT-PCR. Levels of mRNA are represented as fold change (mean  $\pm$  SD) compared to medium only treated samples at the same time-point. \*,  $P < 0.05$ ; \*\*,  $P < 0.01$ ; \*\*\*,  $P < 0.001$  (compared to medium only at the same time-point).
